# Supplementary material for: A Comparative Phylogenetic Analysis on the Chloroplast Genome in Different Reynoutria japonica Populations
Source: MDPI journal article supplement (doi:10.3390/genes13111979), 2022-10-30
Supplement: s1 [file s1]

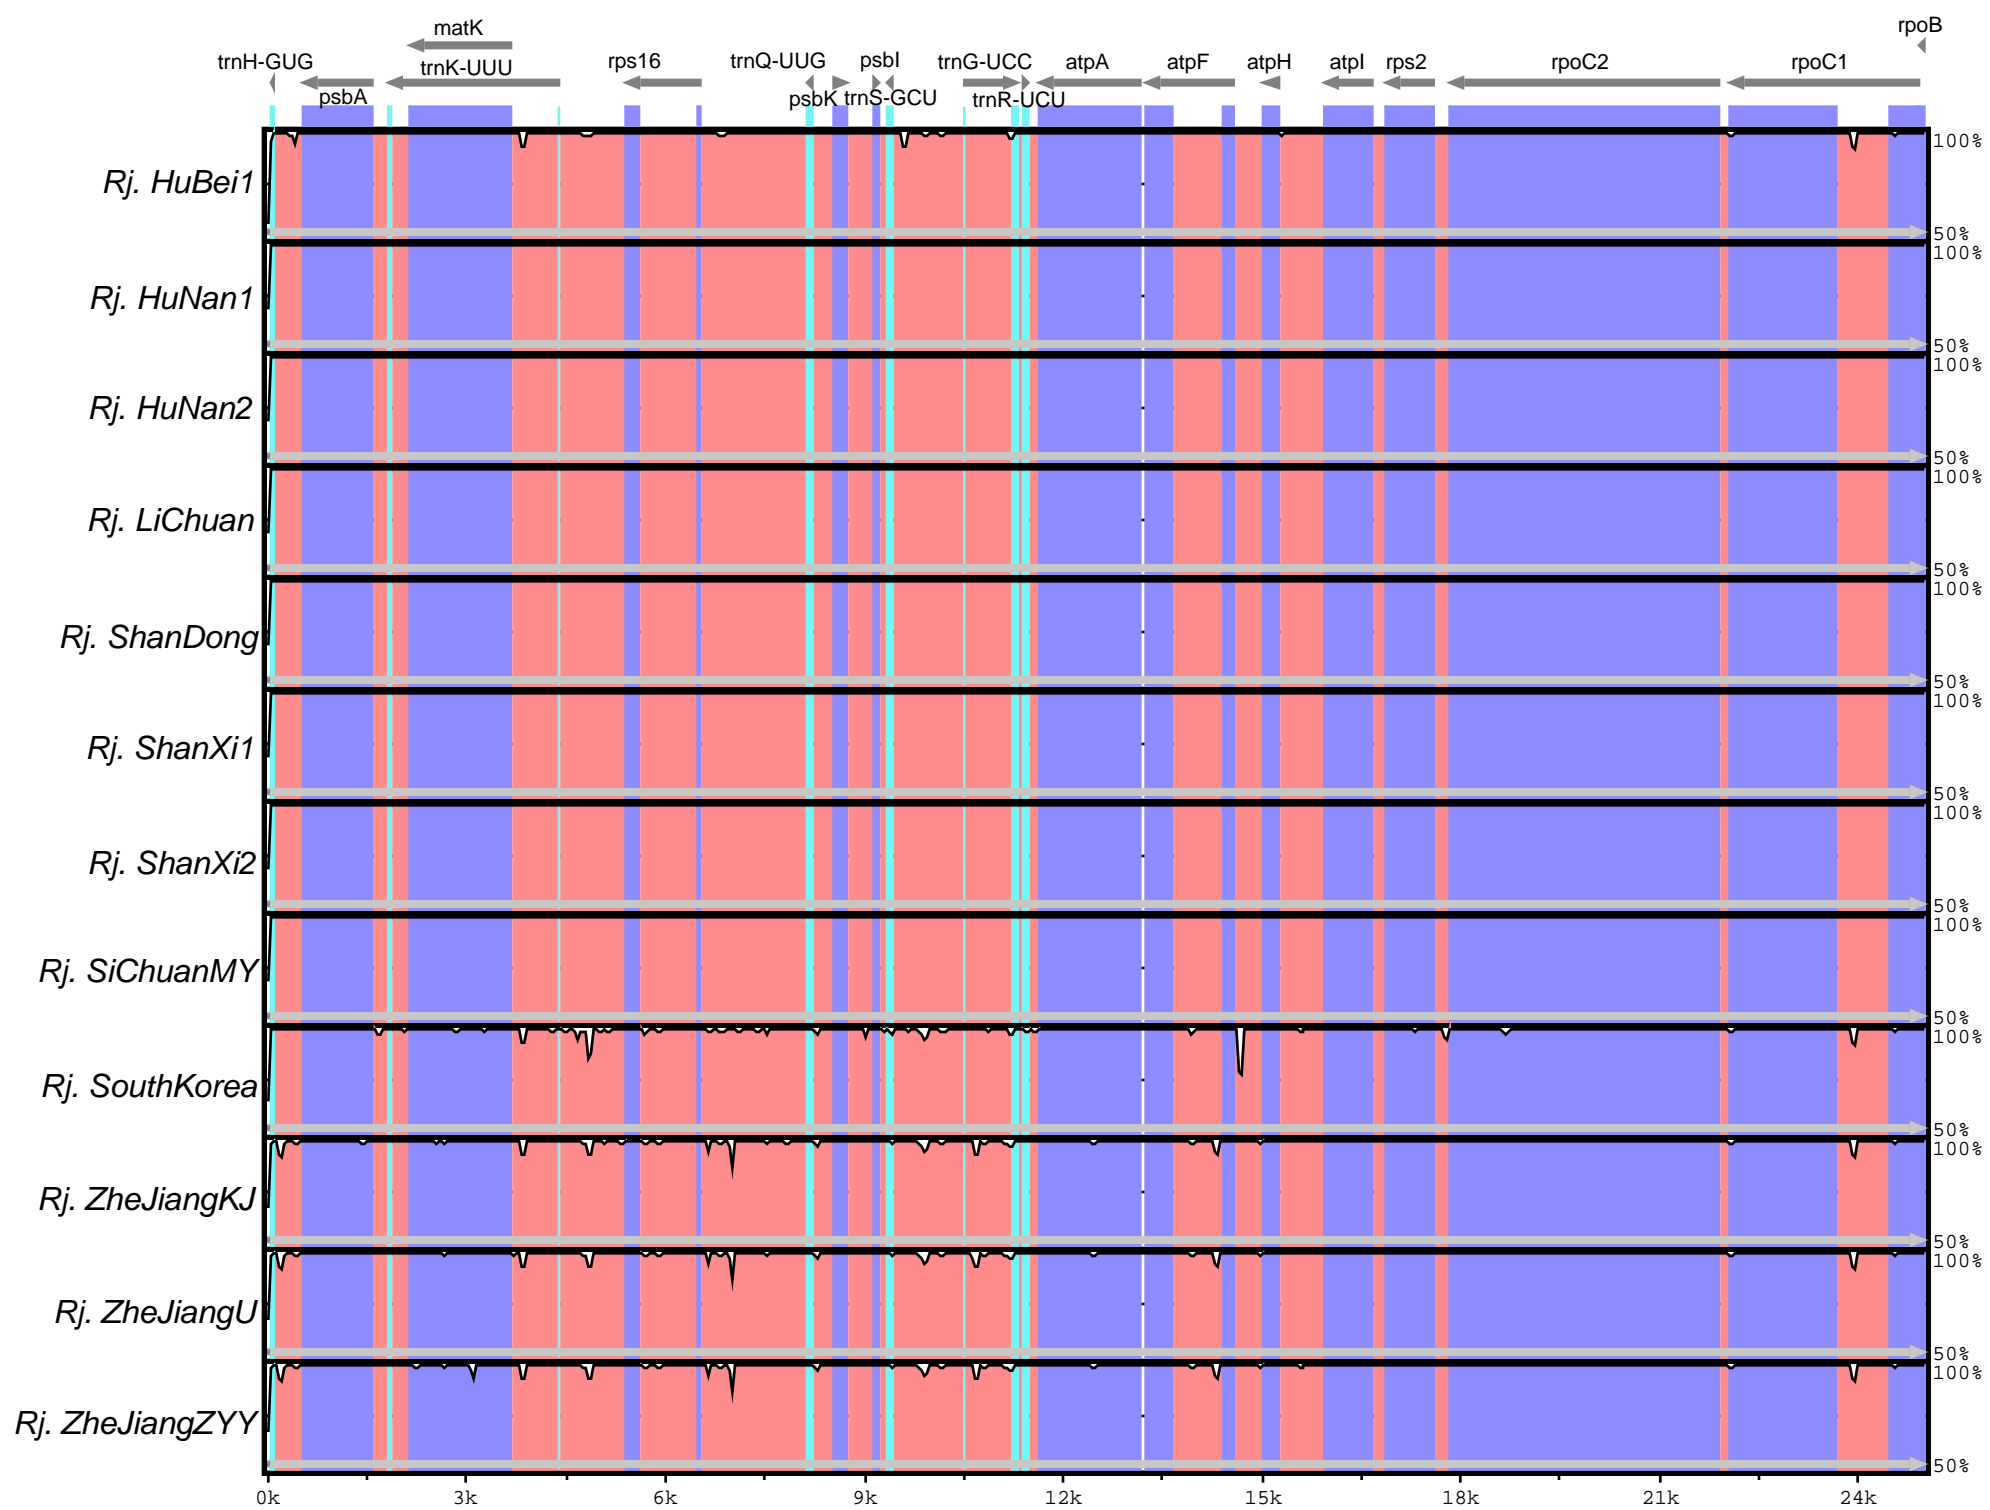

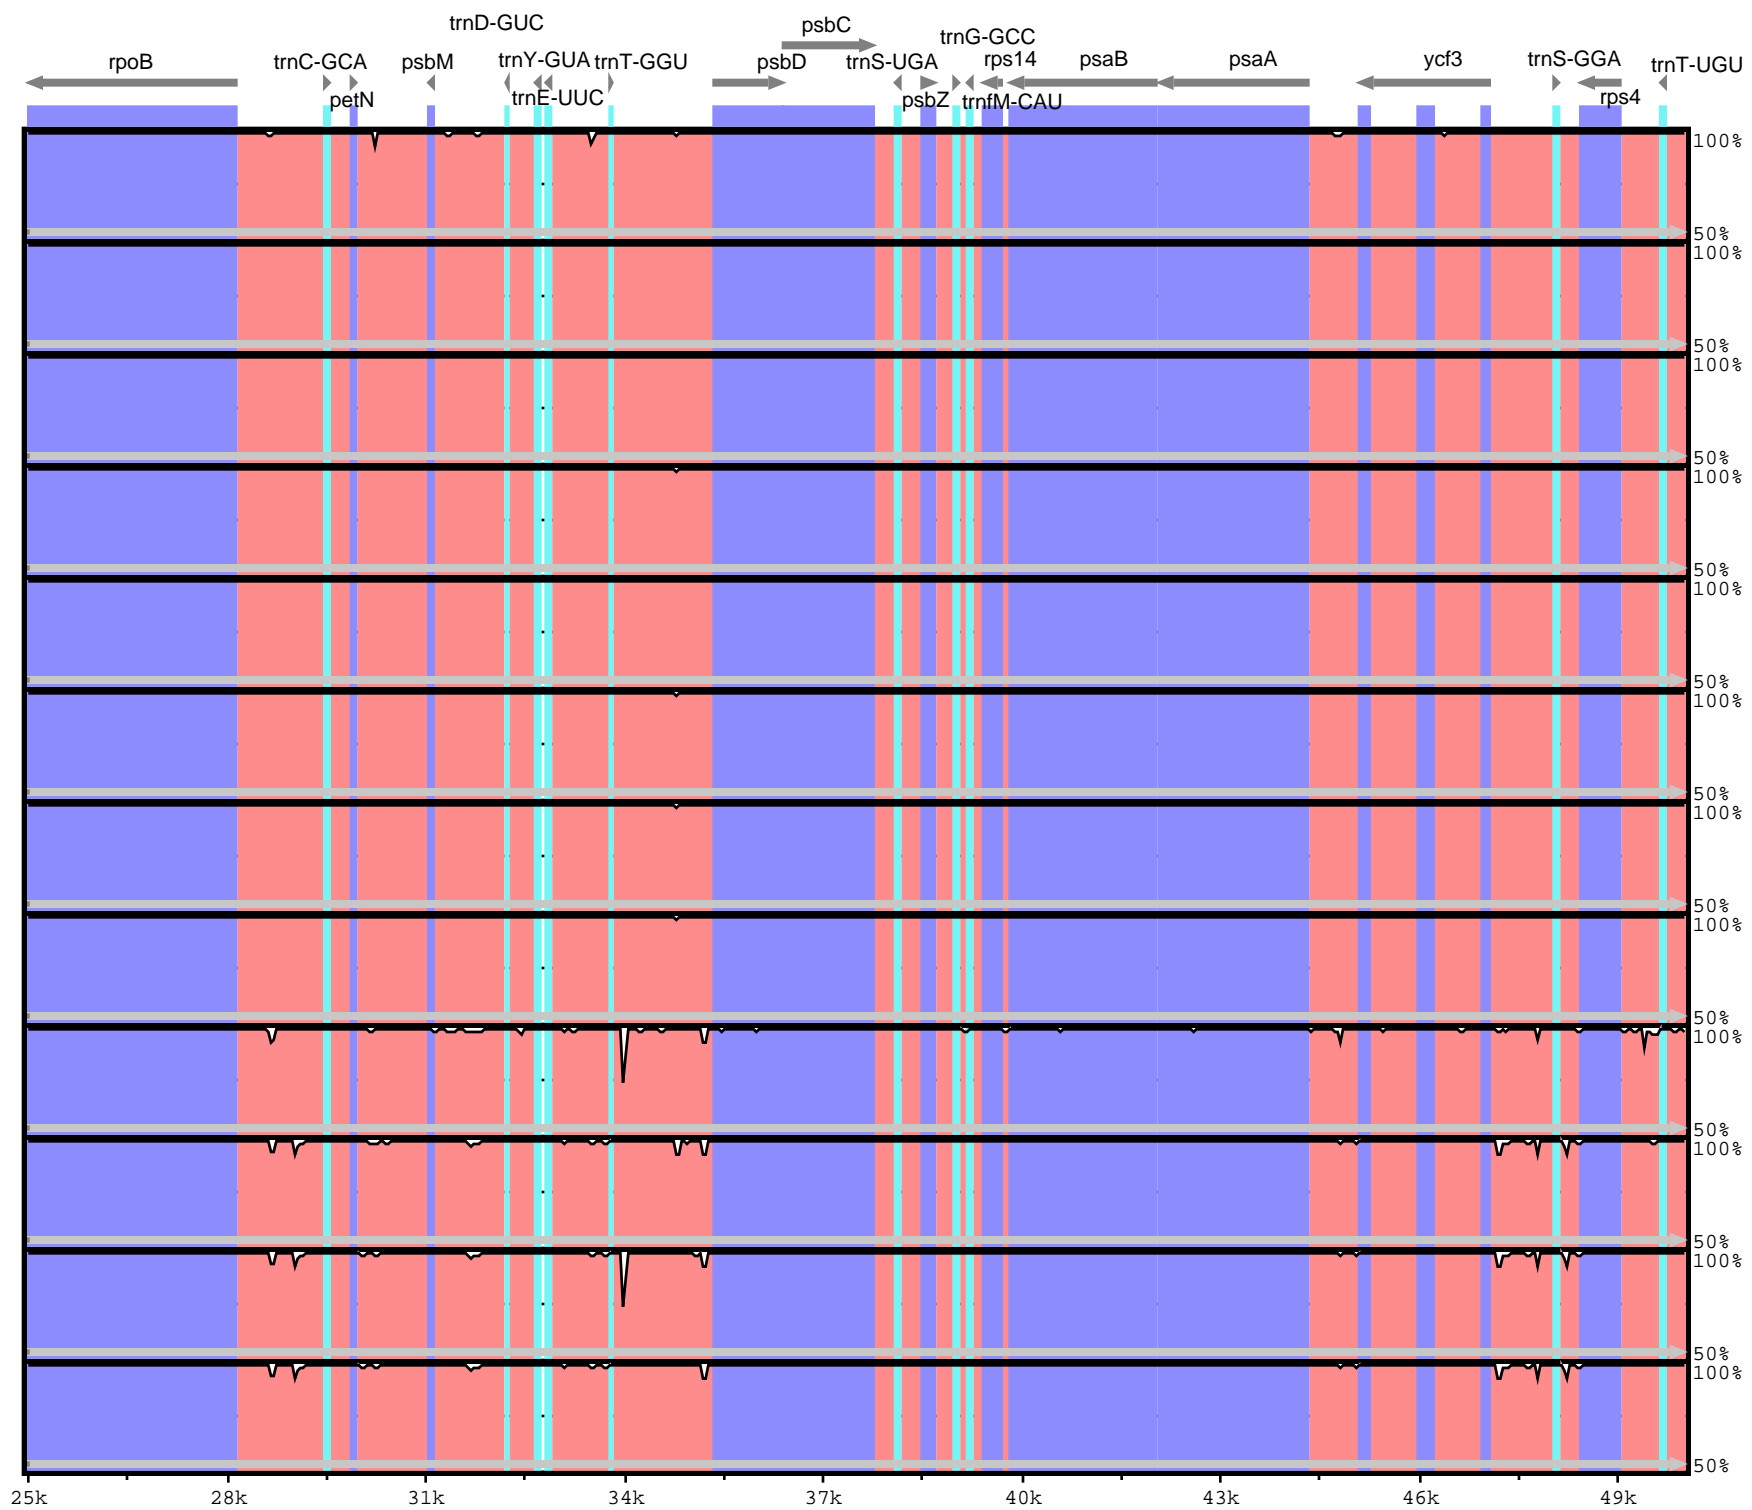

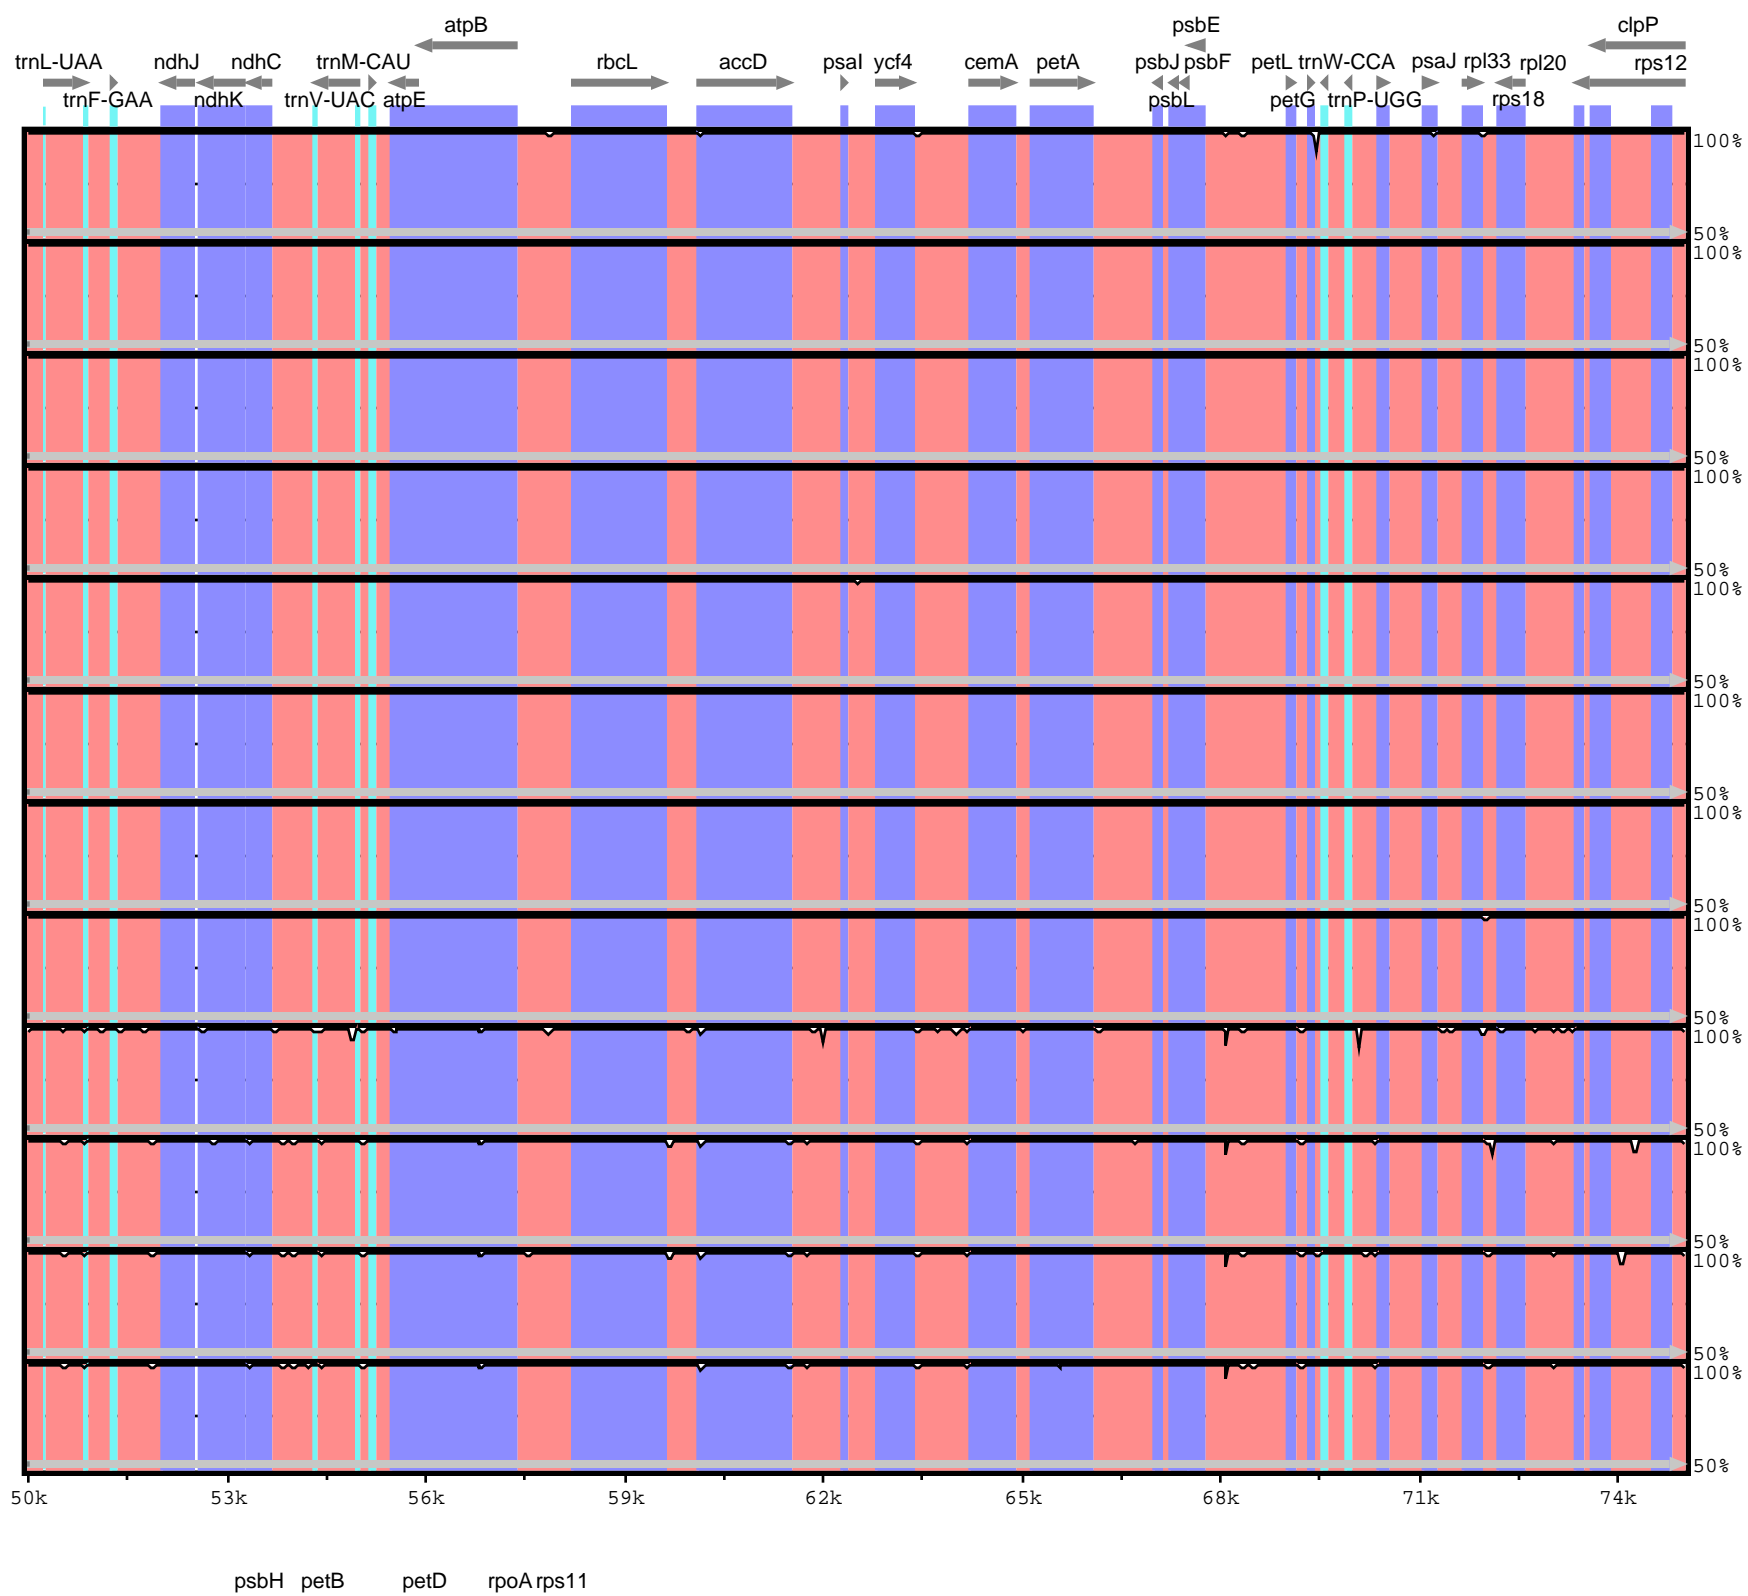

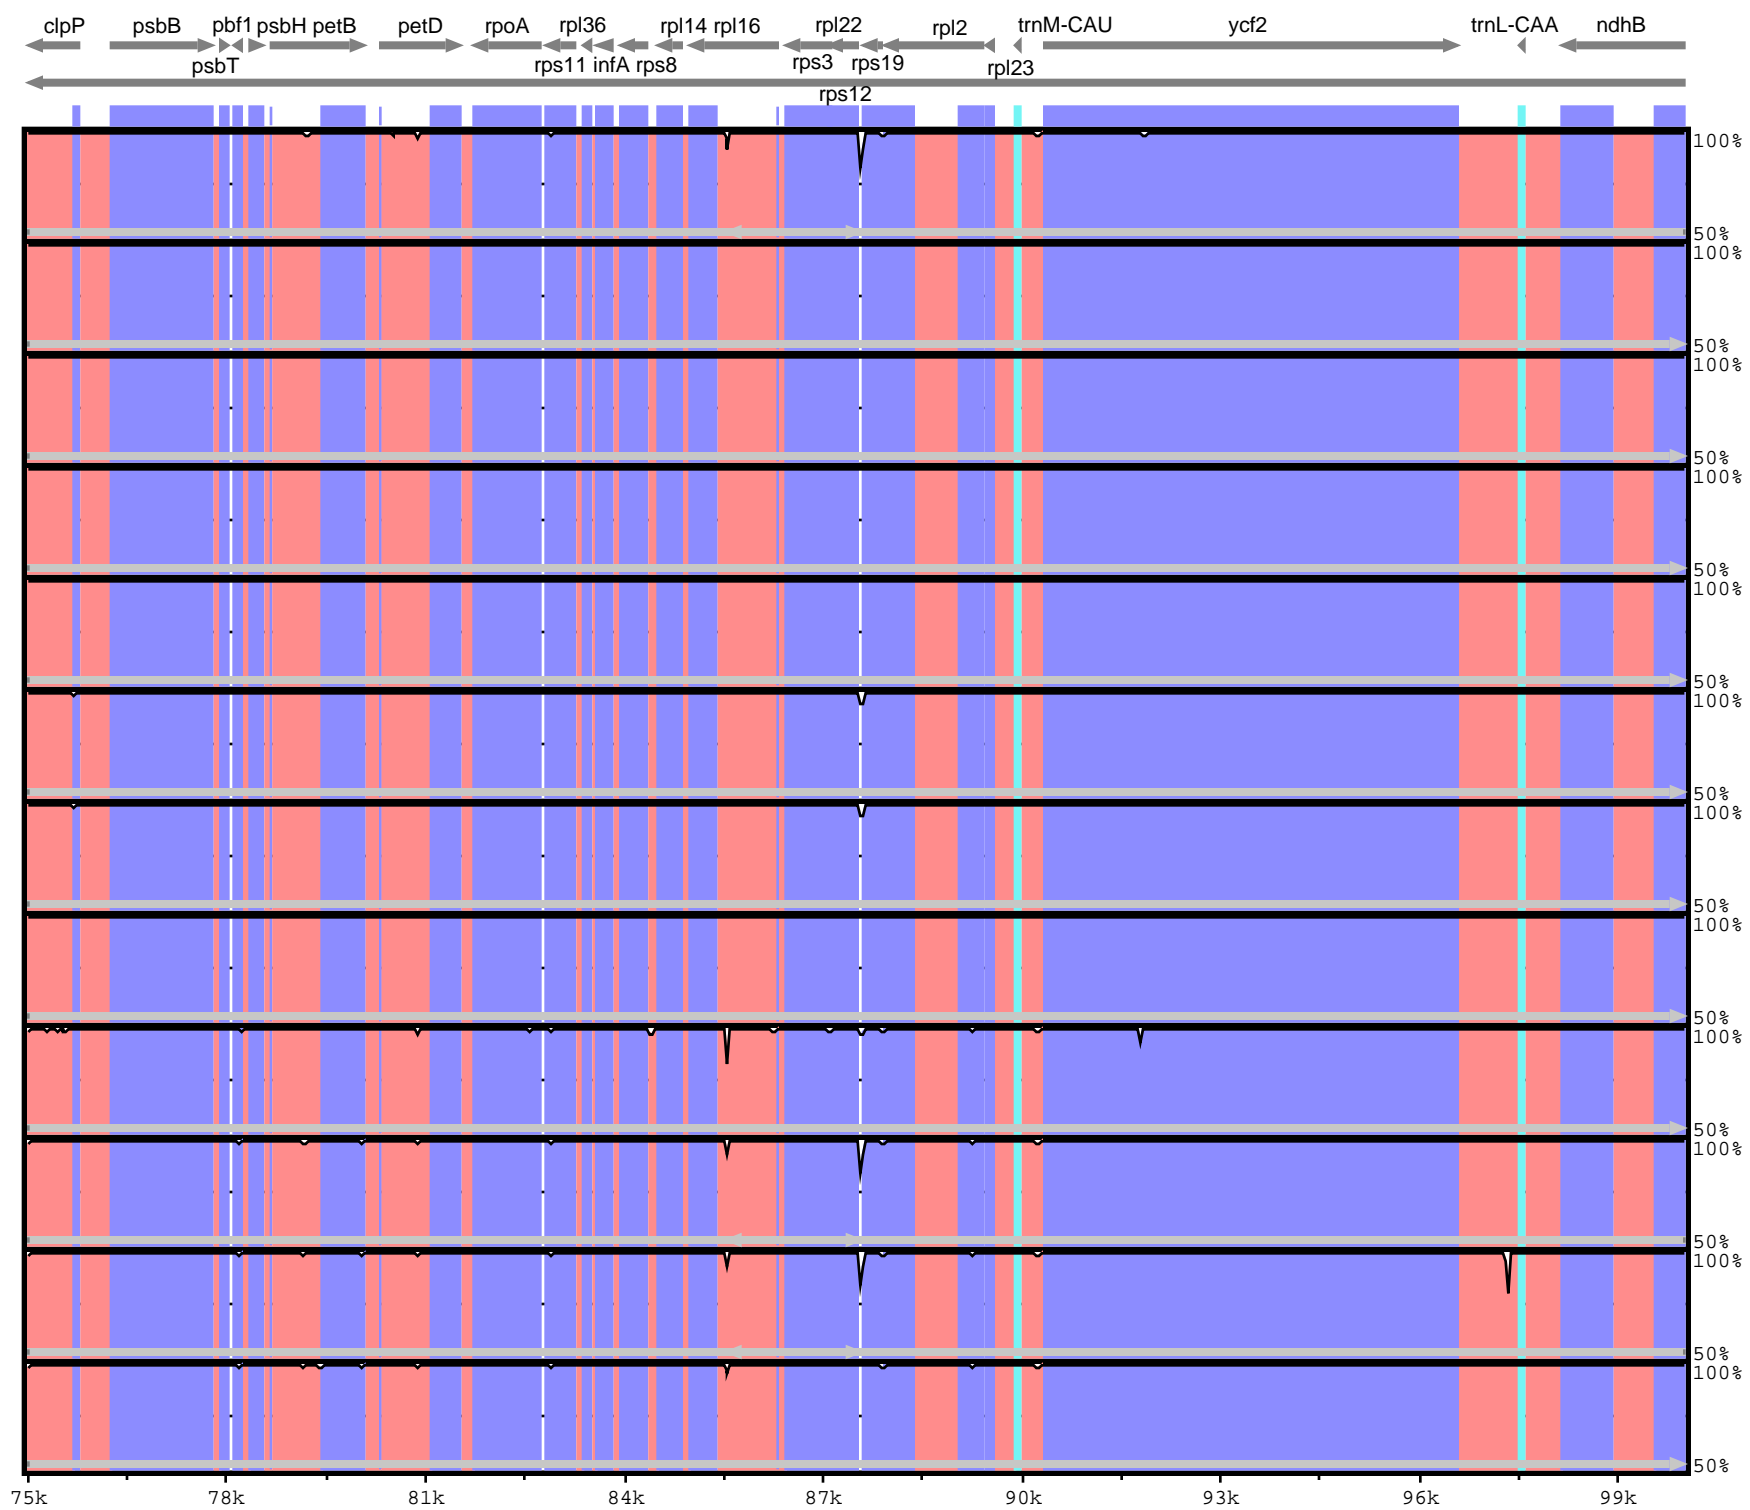

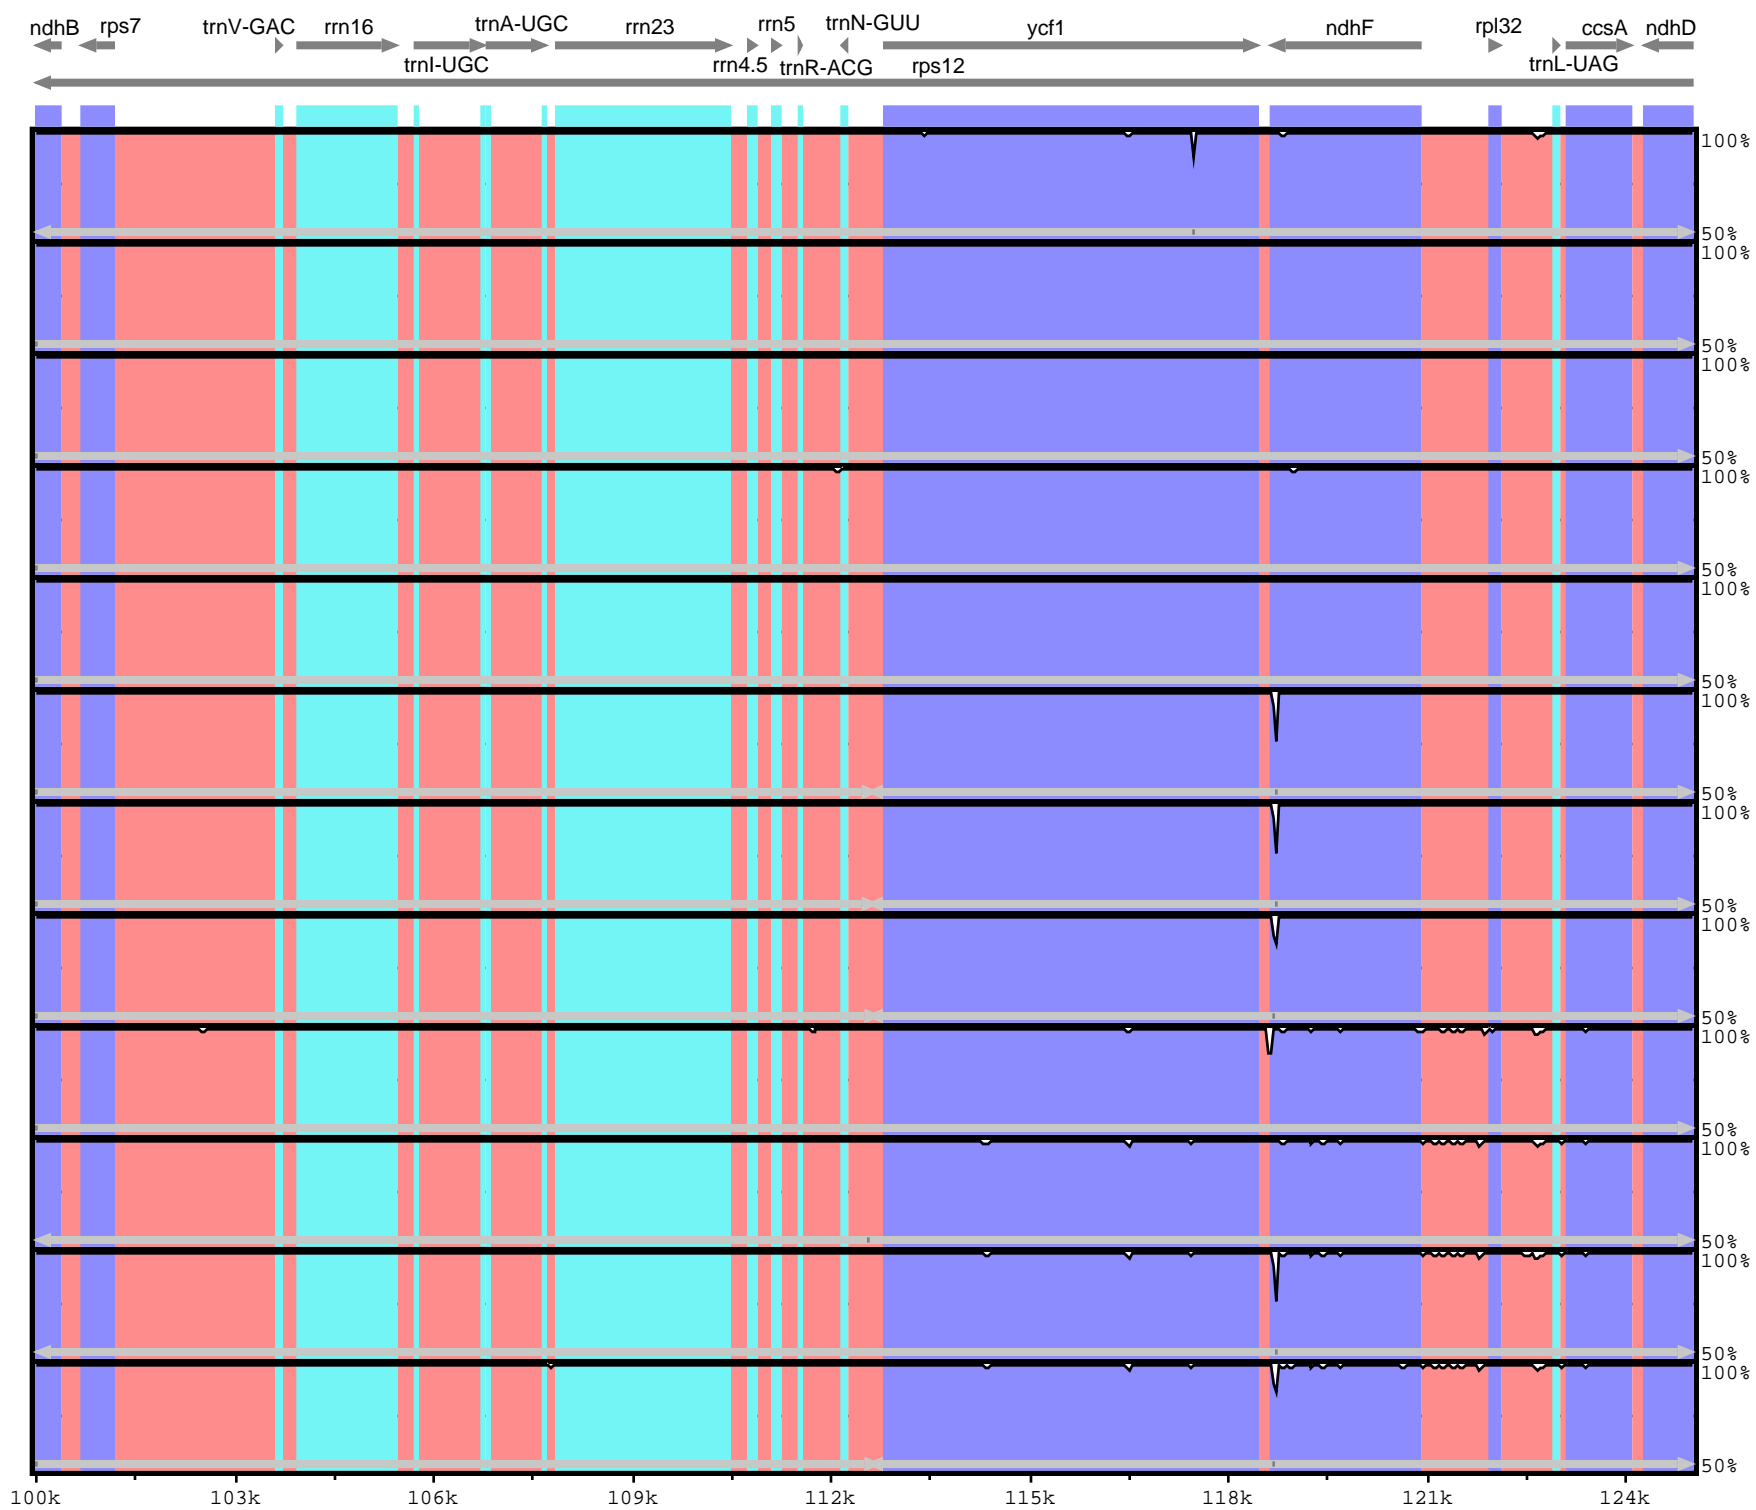

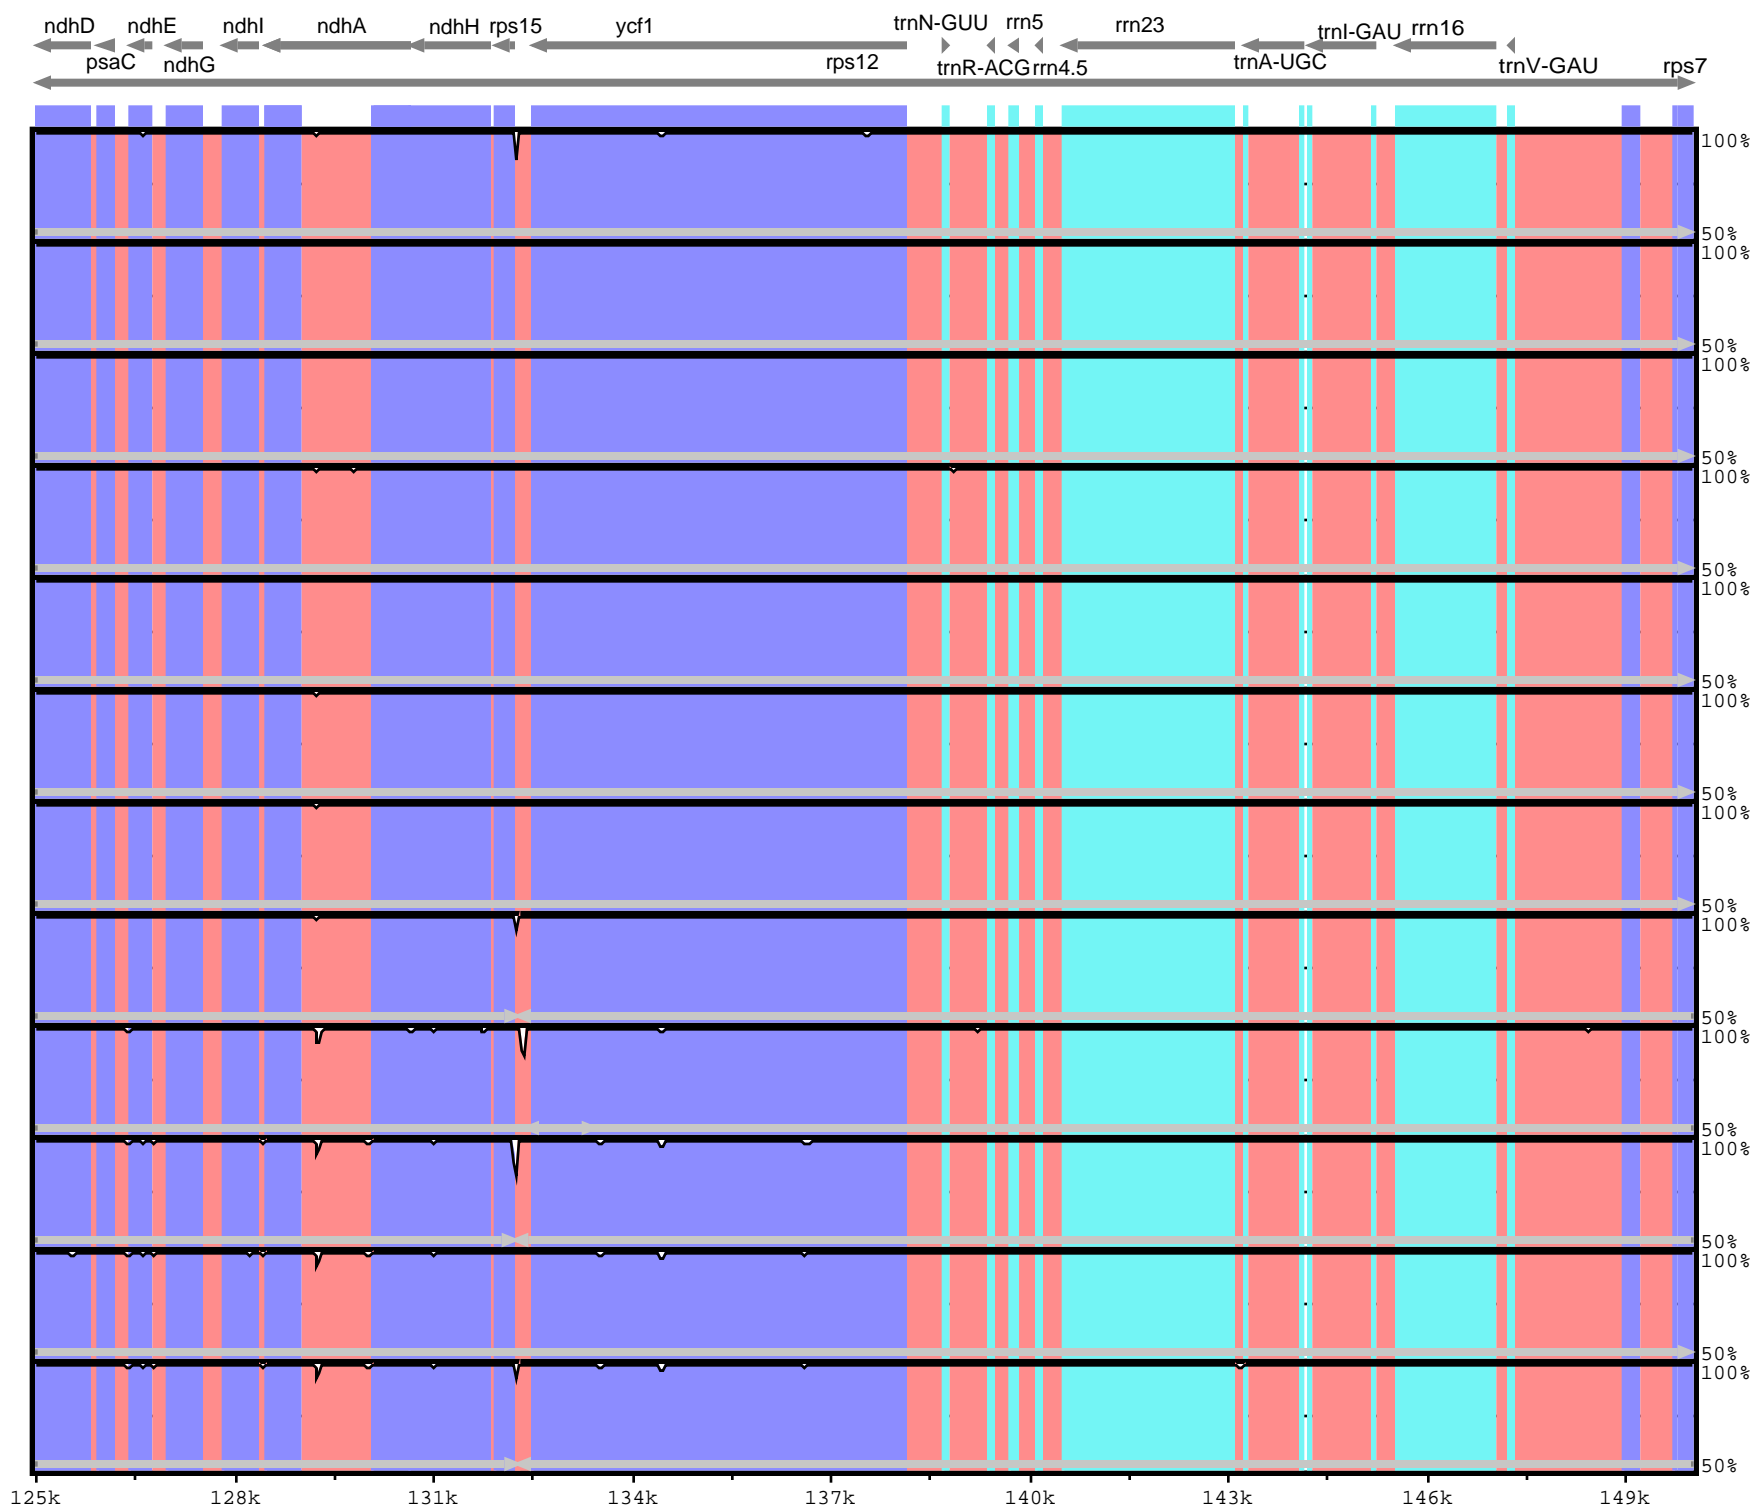

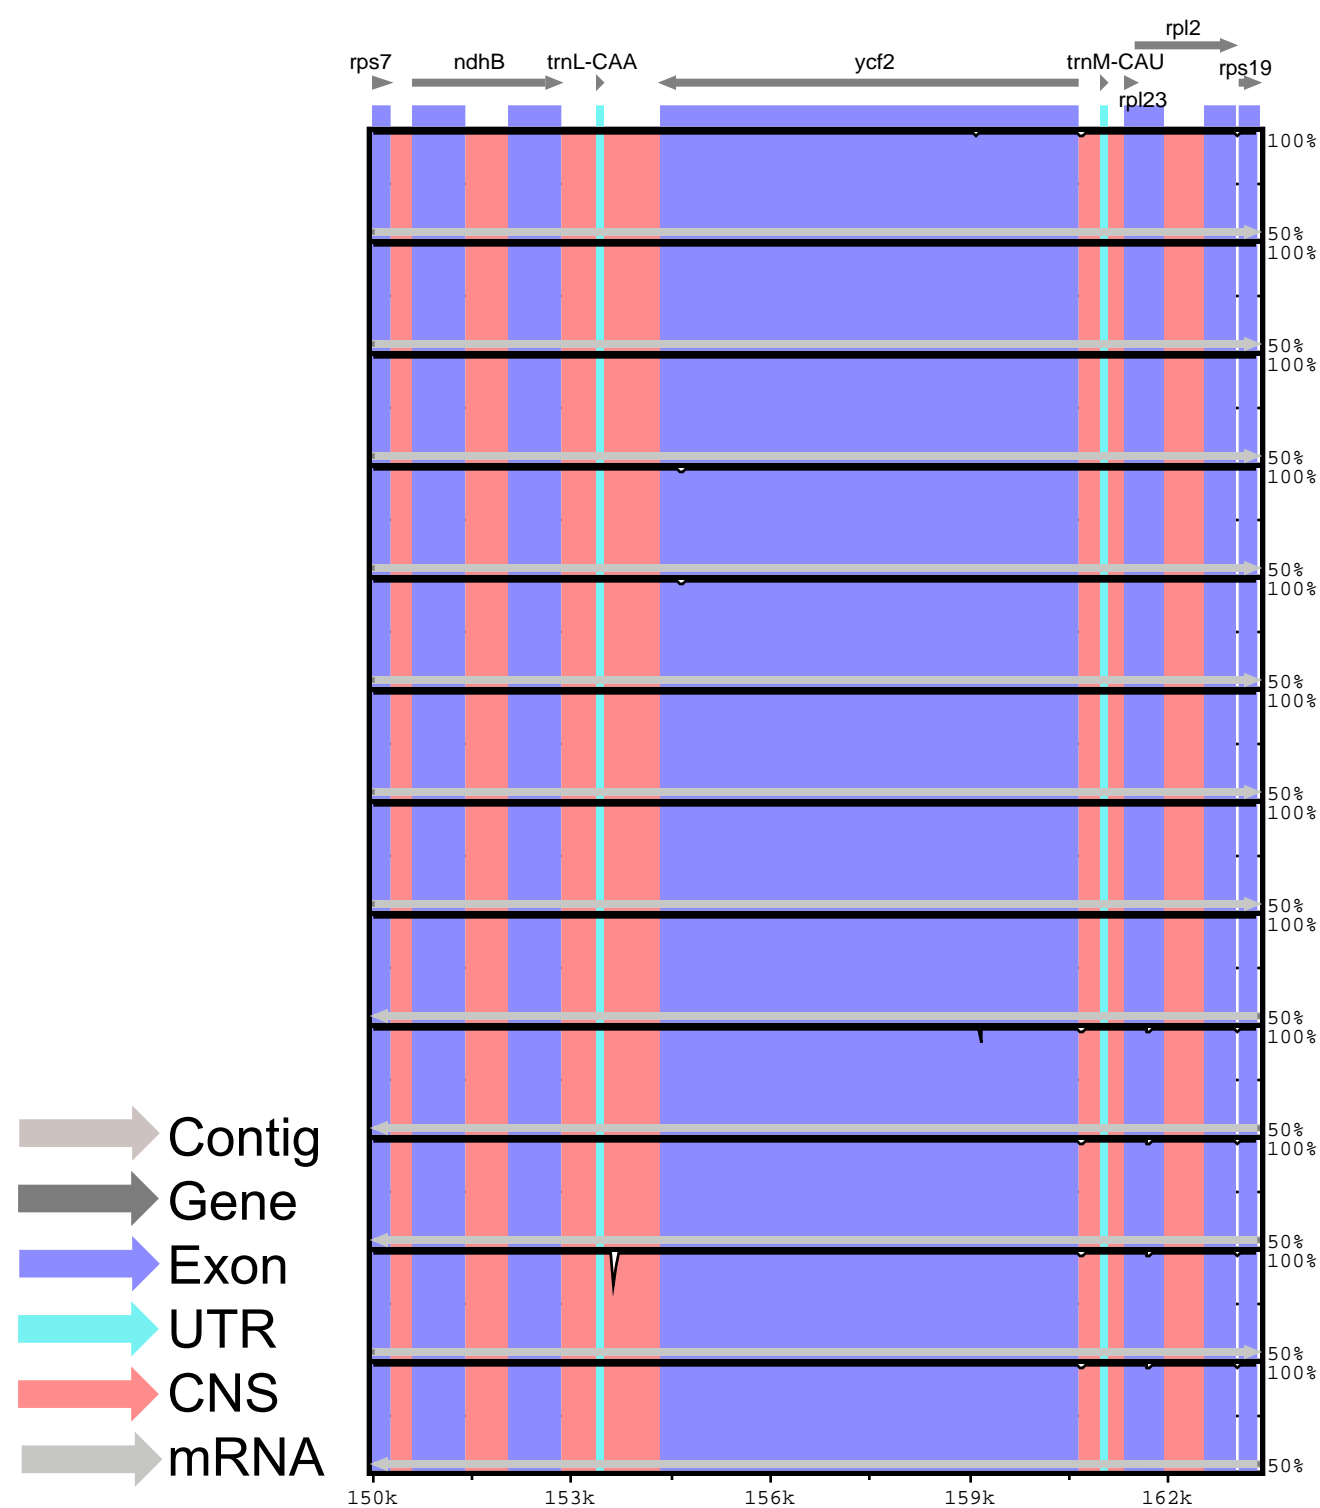

**Figure S1.** Comparison of thirteen *Reynoutria* chloroplast genomes using mVISTA, with *Rj. BeiJing* as the reference. The Y-axis represents the percent identity within 50~100%. Gray arrows indicate the direction of gene transcription. Purple bars represent exons, blue bars represent untranslated regions (UTR), pink bars indicate conserved noncoding sequences (CNS), gray bars represent mRNA, and white peaks represent differences of genomics.
